# Supplementary material for: PLK1 Inhibition Induces Immunogenic Cell Death and Enhances Immunity against NSCLC
Source: PubMed Central journal article supplement (PMC8436107; doi:10.7150/ijms.60135), 2021-08-19
Supplement: ijmsv18p3516s1.pdf [file ijmsv18p3516s1.pdf]

# PLK1 Inhibition Induces Immunogenic Cell Death and Enhances Immunity Against NSCLC

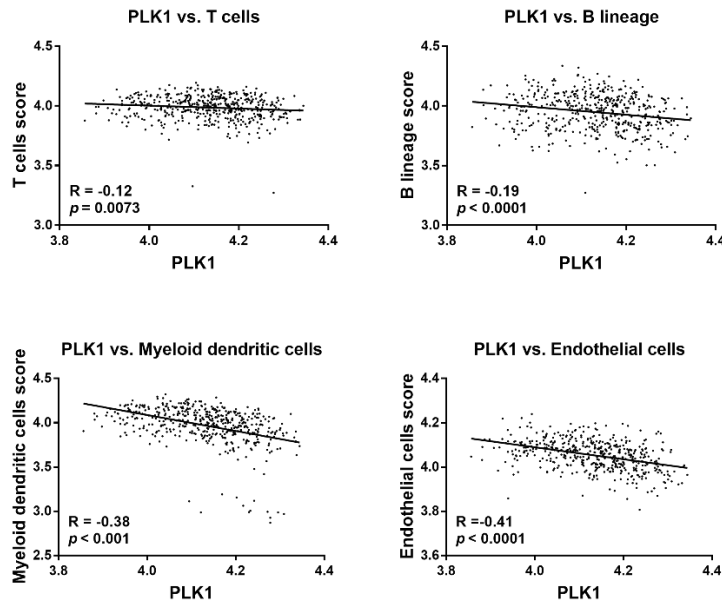

**Fig S1. Negative correlation between PLK1 expression and infiltrating levels of T cells, B lineage, myeloid dendritic cells and endothelial cells in LUAD mined from the TCGA database.**

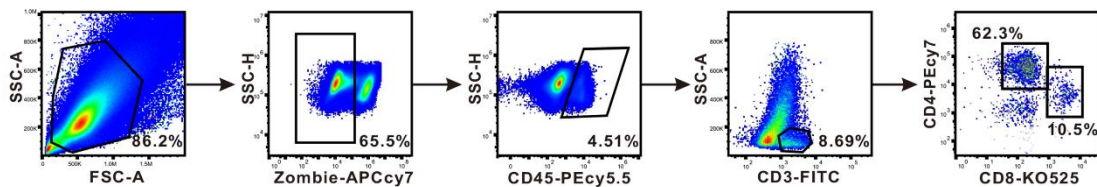

**Fig S2. Gating strategies for the detection ratio of CD4<sup>+</sup>/CD8<sup>+</sup> T cells.**

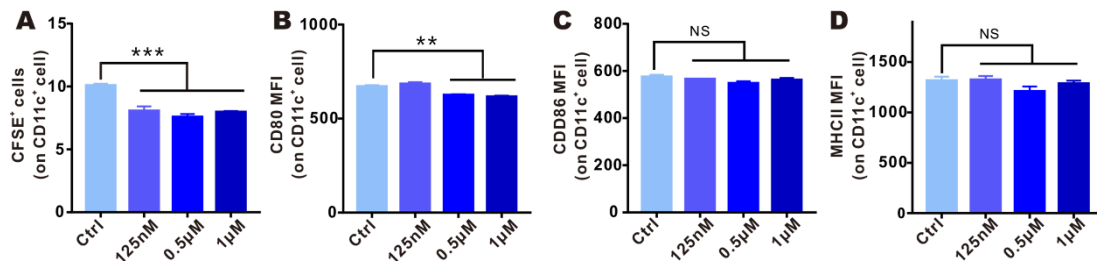

**Fig S3. BI2536 could hardly enhance DC function.**

A. The percentage of CD11c<sup>+</sup> BMDCs with engulfed Lewis cells after treatment with

BI2536.

B-D. Surface expression of CD80, CD86 and MHCII on BI2536-treated CD11c<sup>+</sup> DCs.

**Supplementary Table 1. Multiple Comparisons of the PLK1 expressions at stages 1-4**

LSD

| (I) Stage | (J) Stage | Mean difference<br>(I-J) | Std. Error | Sig.  | 95% CI      |             |
|-----------|-----------|--------------------------|------------|-------|-------------|-------------|
|           |           |                          |            |       | Lower Bound | Upper Bound |
| 1         | 2         | -.03918*                 | 0.0107     | 0     | -0.0602     | -0.0181     |
|           | 3         | -.04520*                 | 0.01236    | 0     | -0.0695     | -0.0209     |
|           | 4         | -.06015*                 | 0.01996    | 0.003 | -0.0994     | -0.0209     |
| 2         | 1         | .03918*                  | 0.0107     | 0     | 0.0181      | 0.0602      |
|           | 3         | -0.00602                 | 0.01409    | 0.669 | -0.0337     | 0.0217      |
|           | 4         | -0.02097                 | 0.02107    | 0.32  | -0.0624     | 0.0204      |
| 3         | 1         | .04520*                  | 0.01236    | 0     | 0.0209      | 0.0695      |
|           | 2         | 0.00602                  | 0.01409    | 0.669 | -0.0217     | 0.0337      |
|           | 4         | -0.01495                 | 0.02196    | 0.496 | -0.0581     | 0.0282      |
| 4         | 1         | .06015*                  | 0.01996    | 0.003 | 0.0209      | 0.0994      |
|           | 2         | 0.02097                  | 0.02107    | 0.32  | -0.0204     | 0.0624      |
|           | 3         | 0.01495                  | 0.02196    | 0.496 | -0.0282     | 0.0581      |

\*. The mean difference is significant at the 0.05 level.

LSD= least significance difference

**Supplementary Table 2. ANOVA analysis of the PLK1 expression at stages 1-4**

|                | Sum of squares | df  | Mean square | F    | Sig. |
|----------------|----------------|-----|-------------|------|------|
| Between Groups | 0.246          | 3   | 0.082       | 8.67 | 0    |
| Within Groups  | 4.683          | 495 | 0.009       |      |      |
| Total          | 4.929          | 498 |             |      |      |

**Supplementary Table 3. Multiple Comparisons of the PLK1 expression at stages 2-4**

LSD

| (I)Stage | (J) Stage | Mean difference (I-J) | Std. Error | Sig.  | 95% CI      |             |
|----------|-----------|-----------------------|------------|-------|-------------|-------------|
|          |           |                       |            |       | Lower Bound | Upper Bound |
| 2        | 3         | -0.00602              | 0.01352    | 0.657 | -0.0327     | 0.0206      |
|          | 4         | -0.02097              | 0.02022    | 0.301 | -0.0608     | 0.0189      |
| 3        | 2         | 0.00602               | 0.01352    | 0.657 | -0.0206     | 0.0327      |
|          | 4         | -0.01495              | 0.02107    | 0.479 | -0.0565     | 0.0266      |
| 4        | 2         | 0.02097               | 0.02022    | 0.301 | -0.0189     | 0.0608      |
|          | 3         | 0.01495               | 0.02107    | 0.479 | -0.0266     | 0.0565      |

LSD= least significance difference

**Supplementary Table 4. ANOVA analysis of the PLK1 expression at stages 2-4**

|                | Sum of squares | df  | Mean square | F     | Sig.  |
|----------------|----------------|-----|-------------|-------|-------|
| Between Groups | 0.01           | 2   | 0.005       | 0.553 | 0.576 |
| Within Groups  | 1.925          | 221 | 0.009       |       |       |
| Total          | 1.935          | 223 |             |       |       |

**Supplementary Table 5. Correlations between PLK1 and immune checkpoints**

| Variable 1 | Variable 2 | Pearson correlation coefficient | P value |
|------------|------------|---------------------------------|---------|
| PLK1       | PD1        | 0.1561                          | 0.0005  |
| PLK1       | PDL1       | 0.2644                          | <0.0001 |
| PLK1       | LAG3       | 0.1779                          | <0.0001 |
| PLK1       | SIGLEC10   | 0.1673                          | 0.0002  |
| PLK1       | IDO1       | 0.1682                          | 0.0002  |
| PD1        | PDL1       | 0.4063                          | <0.0001 |
| PD1        | LAG3       | 0.613                           | <0.0001 |
| PD1        | SIGLEC10   | 0.554                           | <0.0001 |
| PD1        | IDO1       | 0.238                           | <0.0001 |
| PDL1       | LAG3       | 0.2966                          | <0.0001 |
| PDL1       | SIGLEC10   | 0.4036                          | <0.0001 |
| PDL1       | IDO1       | 0.302                           | <0.0001 |
| LAG3       | SIGLEC10   | 0.4968                          | <0.0001 |
| LAG3       | IDO1       | 0.3463                          | <0.0001 |
| SIGLEC10   | IDO1       | 0.2761                          | <0.0001 |
